# Supplementary material for: CD4+ regulatory and naïve T cells specific for factor VIII stand vis‐à‐vis to balance the immune response in healthy individuals
Source: PubMed Central journal article supplement (PMC9175863; doi:10.1002/jha2.319), 2021-11-02
Supplement: JHA2-2-805-s001.pdf [file JHA2-2-805-s001.pdf]

**Supplemental Table 1:** Antibodies used for staining of stimulated PBMCs. All antibodies were obtained from Miltenyi Biotec (Bergisch Gladbach, Germany), the fixable viability dye eFluor520 was obtained from Thermo Fisher (Waltham, USA).

| <b>Antibody Specificity</b> | <b>Antibody Conjugate</b> | <b>Clone</b> |
|-----------------------------|---------------------------|--------------|
| CD8                         | FITC                      | REA734       |
| CD56                        | FITC                      | REA196       |
| CD19                        | FITC                      | REA675       |
| CD14                        | FITC                      | REA599       |
| Viability                   | eFluor520                 |              |
| CD25                        | APC                       | REA570       |
| CD45RA                      | PerCP-Vio700              | REA562       |
| CD154                       | PE-Vio770                 | 5C8          |
| CD137                       | PE                        | 4B4-1        |
| CD127                       | APC-Vio770                | REA614       |
| CD197                       | VioBlue                   | REA546       |
| CD4                         | VioGreen                  | REA623       |

**Supplemental Table 2:** Responsiveness of CD4<sup>+</sup> non-Tregs (A) and Tregs (B) based on expression of CD154 and CD137. The observed rates of reacting samples are presented descriptively with counts, percentages and its two-sided 95% Clopper-Pearson confidence intervals (CIs). Higher expression of markers in stimulated samples in comparison to the unstimulated control is presented as “1”, a lower expression as “0”. PBMCs of all analysed Buffy Coats responded to the anti-CD3 stimulus as positive control.

**A)**

**CD154-positive non-Tregs**

|                 | 1 IU/ml<br>rFVIII  | 1 IU/100 µl<br>rFVIII | 1 IU/ml<br>rFVIIIFc | 1 IU/100 µl<br>rFVIII Fc | 740 pM<br>MOG      | 7.4 nM<br>MOG      | anti-CD3<br>(5 µg/ml) |
|-----------------|--------------------|-----------------------|---------------------|--------------------------|--------------------|--------------------|-----------------------|
| Sample 1        | 1                  | 0                     | 1                   | 0                        | 0                  | 0                  | 1                     |
| Sample 2        | 1                  | 1                     | 1                   | 0                        | 0                  | 1                  | 1                     |
| Sample 3        | 1                  | 0                     | 0                   | 0                        | 0                  | 1                  | 1                     |
| Sample 4        | 1                  | 0                     | 1                   | 0                        | 1                  | 1                  | 1                     |
| Sample 5        | 0                  | 1                     | 0                   | 1                        | 0                  | 1                  | 1                     |
| Sample 6        | 0                  | 1                     | 0                   | 1                        | 0                  | 1                  | 1                     |
| Sample 7        | 1                  | 1                     | 1                   | 1                        | 0                  | 0                  | 1                     |
| Sample 8        | 0                  | 1                     | 0                   | 0                        | 0                  | 0                  | 1                     |
| Sample 9        | 0                  | 1                     | 0                   | 1                        | 1                  | 0                  | 1                     |
| Sample 10       | 1                  | 1                     | 0                   | 0                        | 1                  | 0                  | 1                     |
| Sample 11       | 0                  | 1                     | 0                   | 1                        | 0                  | 0                  | 1                     |
| Sample 12       | 0                  | 0                     | 0                   | 0                        | 1                  | 0                  | 1                     |
| Sample 13       | 0                  | 0                     | 0                   | 1                        | 0                  | 1                  | 1                     |
| Sample 14       | 0                  | 1                     | 0                   | 0                        | 1                  | 1                  | 1                     |
| Sample 15       | 0                  | 1                     | 1                   | 1                        | 1                  | 1                  | 1                     |
| Sample 16       | 1                  | 1                     | 1                   | 1                        | 1                  | 0                  | 1                     |
| Sample 17       | 0                  | 1                     | 1                   | 1                        | 0                  | 0                  | 1                     |
| Sample 18       | 0                  | 0                     | 0                   | 0                        | 0                  | 1                  | 1                     |
| Sample 19       | 0                  | 0                     | 0                   | 0                        | 0                  | 0                  | 1                     |
| <b>Total</b>    | <b>7/19</b>        | <b>12/19</b>          | <b>7/19</b>         | <b>9/19</b>              | <b>7/19</b>        | <b>9/19</b>        | <b>19/19</b>          |
| <b>Rate (%)</b> | <b>36.8</b>        | <b>63.2</b>           | <b>36.8</b>         | <b>47.4</b>              | <b>36.8</b>        | <b>47.4</b>        |                       |
| <b>95% CI</b>   | <b>(16.3-61.6)</b> | <b>(38.4-83.7)</b>    | <b>(16.3-61.6)</b>  | <b>(24.5-71.1)</b>       | <b>(16.3-61.6)</b> | <b>(24.5-71.1)</b> |                       |

**B)**

**CD137-positive Tregs**

|                 | 1 IU/ml<br>rFVIII  | 1 IU/100 µl<br>rFVIII | 1 IU/ml<br>rFVIII Fc | 1 IU/100 µl<br>rFVIII Fc | 740 pM<br>MOG      | 7.4 nM<br>MOG     | anti-CD3<br>(5 µg/ml) |
|-----------------|--------------------|-----------------------|----------------------|--------------------------|--------------------|-------------------|-----------------------|
| Sample 1        | 1                  | 1                     | 1                    | 0                        | 0                  | 0                 | 1                     |
| Sample 2        | 0                  | 0                     | 0                    | 0                        | 0                  | 0                 | 1                     |
| Sample 3        | 0                  | 1                     | 0                    | 0                        | 0                  | 0                 | 1                     |
| Sample 4        | 1                  | 1                     | 1                    | 1                        | 1                  | 0                 | 1                     |
| Sample 5        | 0                  | 0                     | 0                    | 1                        | 0                  | 0                 | 1                     |
| Sample 6        | 1                  | 1                     | 1                    | 1                        | 1                  | 1                 | 1                     |
| Sample 7        | 1                  | 1                     | 1                    | 1                        | 1                  | 0                 | 1                     |
| Sample 8        | 0                  | 1                     | 0                    | 0                        | 0                  | 0                 | 1                     |
| Sample 9        | 1                  | 1                     | 0                    | 1                        | 1                  | 1                 | 1                     |
| Sample 10       | 0                  | 1                     | 0                    | 1                        | 0                  | 0                 | 1                     |
| Sample 11       | 1                  | 1                     | 1                    | 1                        | 1                  | 1                 | 1                     |
| Sample 12       | 0                  | 1                     | 0                    | 1                        | 1                  | 0                 | 1                     |
| Sample 13       | 1                  | 1                     | 1                    | 1                        | 1                  | 0                 | 1                     |
| Sample 14       | 1                  | 1                     | 1                    | 1                        | 0                  | 1                 | 1                     |
| Sample 15       | 1                  | 1                     | 0                    | 1                        | 0                  | 0                 | 1                     |
| Sample 16       | 1                  | 1                     | 1                    | 1                        | 1                  | 1                 | 1                     |
| Sample 17       | 1                  | 1                     | 0                    | 1                        | 0                  | 0                 | 1                     |
| Sample 18       | 1                  | 1                     | 0                    | 0                        | 0                  | 0                 | 1                     |
| Sample 19       | 0                  | 0                     | 0                    | 0                        | 0                  | 0                 | 1                     |
| <b>Total</b>    | <b>12/19</b>       | <b>16/19</b>          | <b>8/19</b>          | <b>13/19</b>             | <b>8/19</b>        | <b>5/19</b>       | <b>19/19</b>          |
| <b>Rate (%)</b> | <b>63.2</b>        | <b>84.2</b>           | <b>42.1</b>          | <b>68.4</b>              | <b>42.1</b>        | <b>26.3</b>       |                       |
| <b>95% CI</b>   | <b>(38.4-83.7)</b> | <b>(60.4-96.6)</b>    | <b>(20.3-66.5)</b>   | <b>(43.5-87.4)</b>       | <b>(20.3-66.5)</b> | <b>(9.1-51.2)</b> |                       |

**Supplemental Table 3:** Summary of medians, quartiles, and ranges for the intensity of responsiveness towards mentioned stimuli.

|               | <b>1 IU/100 <math>\mu</math>l rFVIII</b> | <b>1 IU/100 <math>\mu</math>l rFVIII-Fc</b> | <b>7.4 nM MOG</b> |
|---------------|------------------------------------------|---------------------------------------------|-------------------|
| Median        | 1.39                                     | 1.11                                        | 0.88              |
| 1. Qu - 3. Qu | 1.05 - 1.55                              | 0.95 - 1.33                                 | 0.67 - 0.99       |
| Min - Max     | 0.72 - 3.69                              | 0.50 - 2.52                                 | 0.56 - 1.27       |

**Supplemental Table 4:** Summary of medians, quartiles, and ranges for proportion of antigen-specific CD197<sup>+</sup>CD45RA<sup>+</sup> naïve non-Tregs reacting towards the mentioned stimuli.

|               | <b>Unstimulated</b> | <b>1IU/100 µl rFVIII</b> | <b>µl rFVIIIc</b> | <b>7.4 nM MOG</b> | <b>anti-CD3</b> |
|---------------|---------------------|--------------------------|-------------------|-------------------|-----------------|
| Median        | 57.4                | 78.20                    | 68.40             | 65.40             | 53.20           |
| 1. Qu - 3. Qu | 42.60 - 67.65       | 58.70 - 85.65            | 57.10 - 79.75     | 53.00 - 74.90     | 42.00 - 61.40   |
| Min - Max     | 22.2 - 86.8         | 44.10 - 89.90            | 27.20 - 91.90     | 27.70 - 87.10     | 28.70 - 79.30   |
